# Supplementary material
Source: publisher figshare collection journal article supplement (https://acs.figshare.com/ndownloader/files/10946534)
Supplement: Supplementary file 1 [file 10946534]

# Supplementary Information:

## The influence of solvent representation on nuclear shielding calculations of protonation states of small biological molecules

Christina C. Roggatz<sup>1</sup>, Mark Lorch<sup>1</sup> and David M. Benoit<sup>1,2</sup>

<sup>1</sup>Chemistry – School of Mathematics and Physical Sciences, University of Hull, Cottingham Road, Hull, HU6 7RX, UK;

<sup>2</sup>E.A. Milne Centre for Astrophysics & G.W. Gray Centre for Advanced Materials, University of Hull, Cottingham Road, Hull, HU6 7RX, UK

E-mail: roggatz@outlook.com; D.Benoit@hull.ac.uk

**Table T1: Comparison of *aug-pc-2* vs. *aug-pcS-2***

| Nucleus         | <i>aug-pc-2</i> |                | <i>aug-pcS-2</i> |                |
|-----------------|-----------------|----------------|------------------|----------------|
|                 | Accuracy        | R <sup>2</sup> | Accuracy         | R <sup>2</sup> |
| <sup>13</sup> C | ± 2.9           | 1.0            | ± 4.0            | 1.0            |
| <sup>1</sup> H  | ± 1.1           | 0.2            | ± 2.2            | 0.16           |

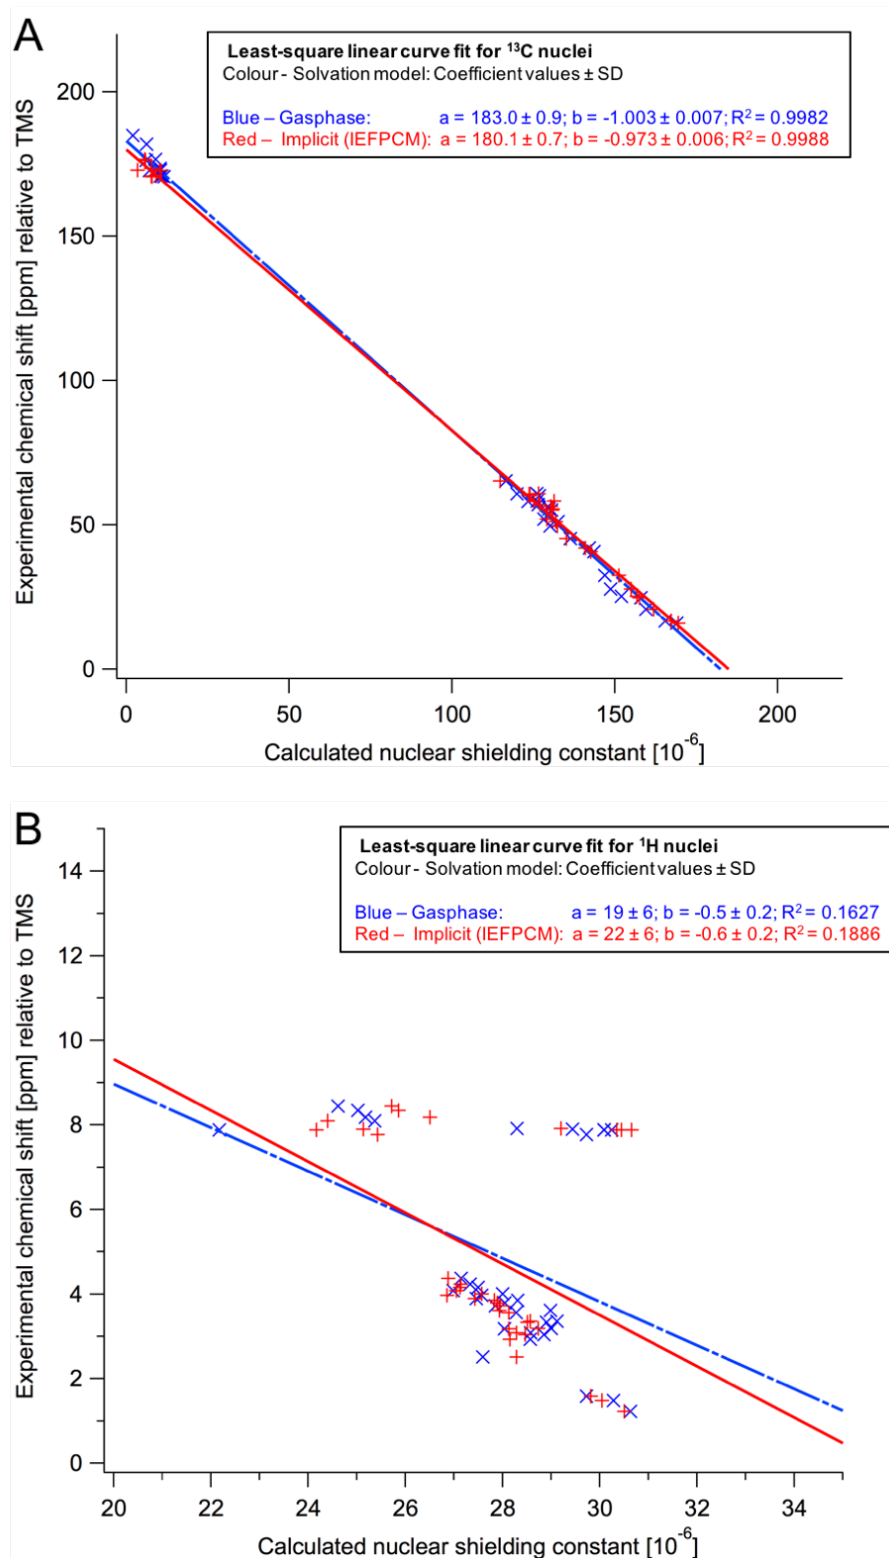

**Fig. S2: Correlation between nuclear shielding values calculated in gas phase or IEFPCM and experimental chemical shift values for  $^{13}\text{C}$  (A) and  $^1\text{H}$  (B) nuclei. For both nuclei types, calculations were performed in gas phase (blue, intermitted line) and implicit solvation (IEFPCM) (red, continuous line).**

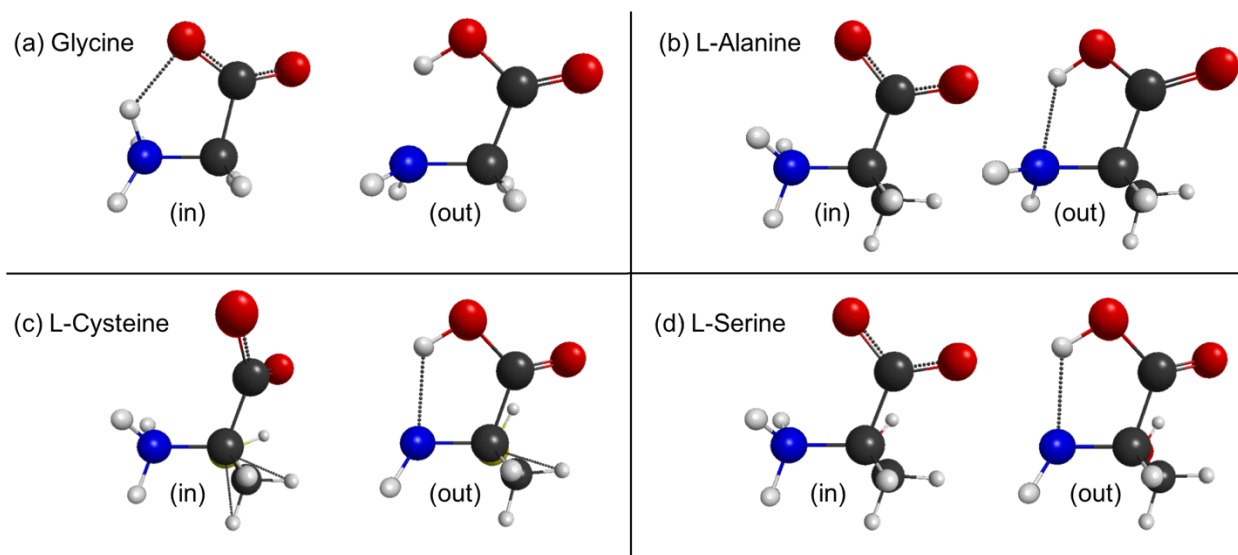

**Fig. S3** Relocation of a proton in the zwitterionic state between starting conformation (in) and conformation optimized in gas phase (out). Atom types are coded by colour: carbon – black, hydrogen – white, oxygen – red, nitrogen – blue, sulfur – yellow.

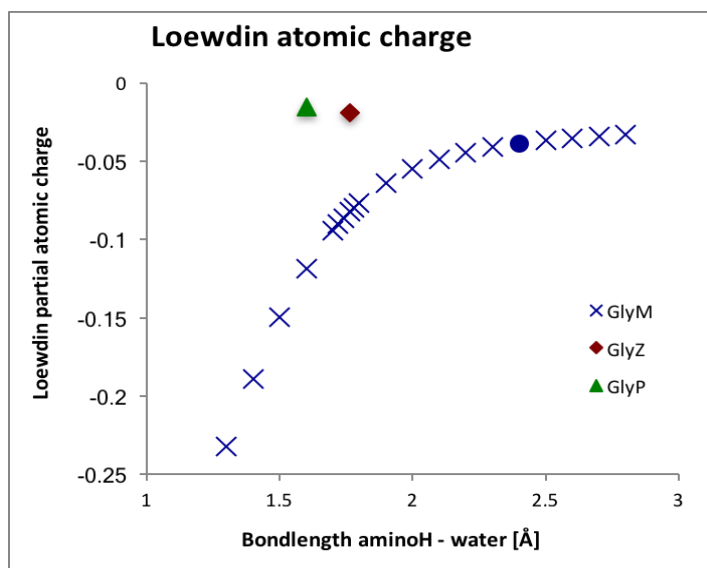

**Fig. S4:** Partial charge of the  $H_N$  of the glycine anion (blue) with varying bond length. Blue dot indicates energy lowest conformer. Partial charge for  $H_N$  of the optimised glycine zwitterion and protonated form are also shown (red and green, respectively).

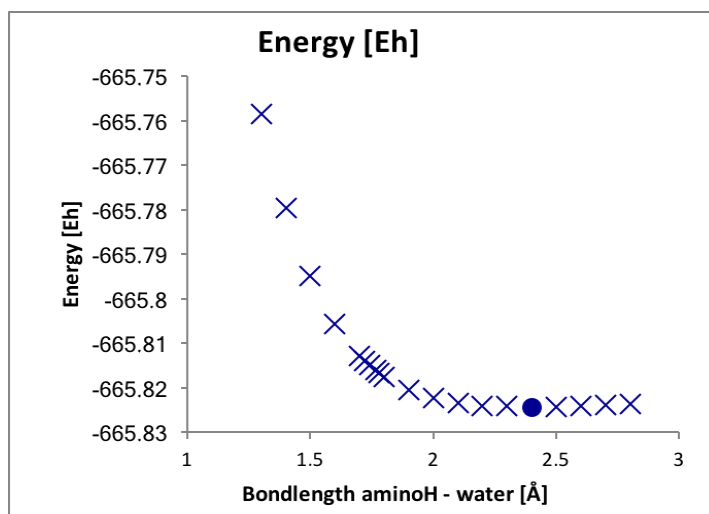

**Fig. S5:** *Energy* of the glycine anion (blue) with varying bond length. Blue dot indicates energy lowest conformer.

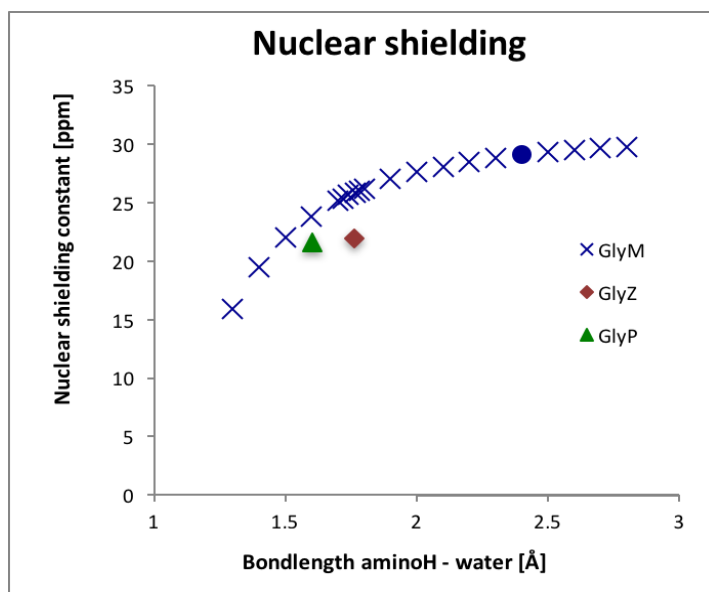

**Fig. S6:** *Nuclear shielding* of the  $H_N$  of the glycine anion (blue) with varying bond length. Blue dot indicates energy lowest conformer. Partial charge for  $H_N$  of the optimised glycine zwitterion and protonated form are also shown (red and green, respectively).
